# Supplementary material for: Monitoring Sodium Content in Processed Foods in Argentina 2017–2018: Compliance with National Legislation and Regional Targets
Source: PubMed Central journal article supplement (PMC6682874; doi:10.3390/nu11071474), 2019-06-28
Supplement: nutrients-11-01474-s001.pdf [file nutrients-11-01474-s001.pdf]

Table S1. Food product categories compared against National Act 26905 maximum sodium levels (n 864).

| Food groups                         | Food categories          | Total products (n) | Products under maximum sodium levels |             | Products over target by % of excess |      |        |     |         |     |       |     |
|-------------------------------------|--------------------------|--------------------|--------------------------------------|-------------|-------------------------------------|------|--------|-----|---------|-----|-------|-----|
|                                     |                          |                    | n                                    | %           | 0-25%                               |      | 25-50% |     | 50-100% |     | >100% |     |
|                                     |                          |                    |                                      |             | n                                   | %    | n      | %   | n       | %   | n     | %   |
| Meat and meat products              | Cooked sausages          | 69                 | 63                                   | 91.3        | 2                                   | 2.9  | 3      | 4.3 | 1       | 1.4 | 0     | 0   |
|                                     | Luncheon meat            | 32                 | 26                                   | 81.3        | 5                                   | 15.6 | 0      | 0   | 1       | 3.1 | 0     | 0   |
|                                     | Dry sausages             | 29                 | 24                                   | 82.8        | 5                                   | 17.2 | 0      | 0   | 0       | 0   | 0     | 0   |
|                                     | Fresh sausages           | 31                 | 23                                   | 74.2        | 7                                   | 22.6 | 0      | 0   | 0       | 0   | 1     | 3.2 |
|                                     | Hamburgers               | 42                 | 39                                   | 92.9        | 3                                   | 7.1  | 0      | 0   | 0       | 0   | 0     | 0   |
|                                     | Breaded chicken products | 17                 | 17                                   | 100.0       | 0                                   | 0    | 0      | 0   | 0       | 0   | 0     | 0   |
| <b>Total meat and meat products</b> |                          | <b>220</b>         | <b>192</b>                           | <b>87.3</b> |                                     |      |        |     |         |     |       |     |
| Farinaceous                         | Bran crackers            | 33                 | 33                                   | 100.0       | 0                                   | 0    | 0      | 0   | 0       | 0   | 0     | 0   |
|                                     | Non-bran crackers        | 42                 | 42                                   | 100.0       | 0                                   | 0    | 0      | 0   | 0       | 0   | 0     | 0   |
|                                     | Snack crackers           | 25                 | 25                                   | 100.0       | 0                                   | 0    | 0      | 0   | 0       | 0   | 0     | 0   |
|                                     | Corn flour snacks        | 12                 | 11                                   | 91.7        | 1                                   | 8.3  | 0      | 0   | 0       | 0   | 0     | 0   |
|                                     | Cheese puffs             | 11                 | 11                                   | 100.0       | 0                                   | 0    | 0      | 0   | 0       | 0   | 0     | 0   |
|                                     | Cheese-flavored sticks   | 7                  | 7                                    | 100.0       | 0                                   | 0    | 0      | 0   | 0       | 0   | 0     | 0   |
|                                     | Potato chips             | 64                 | 64                                   | 100.0       | 0                                   | 0    | 0      | 0   | 0       | 0   | 0     | 0   |
|                                     | Unsalted potato chips    | 1                  | 1                                    | 100.0       | 0                                   | 0    | 0      | 0   | 0       | 0   | 0     | 0   |
|                                     | Salted peanuts           | 11                 | 11                                   | 100.0       | 0                                   | 0    | 0      | 0   | 0       | 0   | 0     | 0   |
|                                     | Nachos                   | 9                  | 9                                    | 100.0       | 0                                   | 0    | 0      | 0   | 0       | 0   | 0     | 0   |
|                                     | Other snacks             | 24                 | 23                                   | 95.8        | 0                                   | 0    | 1      | 4.2 | 0       | 0   | 0     | 0   |
|                                     | Dry sweet cookies        | 137                | 134                                  | 97.8        | 1                                   | 0.7  | 1      | 0.7 | 0       | 0   | 1     | 0.7 |
|                                     | Filled sweet cookies     | 98                 | 97                                   | 99.0        | 0                                   | 0    | 0      | 0.0 | 1       | 1.0 | 0     | 0   |
| Whole meal bread                    | 47                       | 41                 | 87.2                                 | 5           | 10.6                                | 0    | 0      | 1   | 2.1     | 0   | 0     |     |

|                                             |                |            |            |       |     |      |   |     |   |   |   |     |
|---------------------------------------------|----------------|------------|------------|-------|-----|------|---|-----|---|---|---|-----|
|                                             | White bread    | 32         | 27         | 84.4  | 4   | 12.5 | 0 | 0   | 0 | 0 | 1 | 3.1 |
|                                             | Hotdog buns    | 10         | 10         | 100.0 | 0   | 0    | 0 | 0   | 0 | 0 | 0 | 0   |
|                                             | Hamburger buns | 14         | 13         | 92.9  | 0   | 0    | 1 | 7.1 | 0 | 0 | 0 | 0   |
| <b>Total farinaceous</b>                    |                | <b>577</b> | <b>559</b> | 96.9  |     |      |   |     |   |   |   |     |
| <b>Soups, bouillons and dressings</b>       | Bouillons      | 24         | 22         | 91.7  | 2.0 | 8.3  | 0 | 0   | 0 | 0 | 0 | 0   |
|                                             | Clear soup     | 11         | 10         | 90.9  | 1   | 9.1  | 0 | 0   | 0 | 0 | 0 | 0   |
|                                             | Cream soup     | 16         | 16         | 100.0 | 0   | 0    | 0 | 0   | 0 | 0 | 0 | 0   |
|                                             | Instant soup   | 16         | 16         | 100.0 | 0   | 0    | 0 | 0   | 0 | 0 | 0 | 0   |
| <b>Total soups, bouillons and dressings</b> |                | <b>67</b>  | <b>64</b>  | 95.5  |     |      |   |     |   |   |   |     |
| <b>Total products</b>                       |                | <b>864</b> | <b>815</b> | 94.3  |     |      |   |     |   |   |   |     |
